# Supplementary material for: Gene Therapy Using a miniCEP290 Fragment Delays Photoreceptor Degeneration in a Mouse Model of Leber Congenital Amaurosis
Source: PubMed Central journal article supplement — Hum Gene Ther. 2018 Jan 1;29(1):42–50. doi: 10.1089/hum.2017.049 (PMC5770090; doi:10.1089/hum.2017.049), 2018-01-01
Supplement: Supp_Fig1.pdf [file Supp_Fig1.pdf]

## Supplementary Data

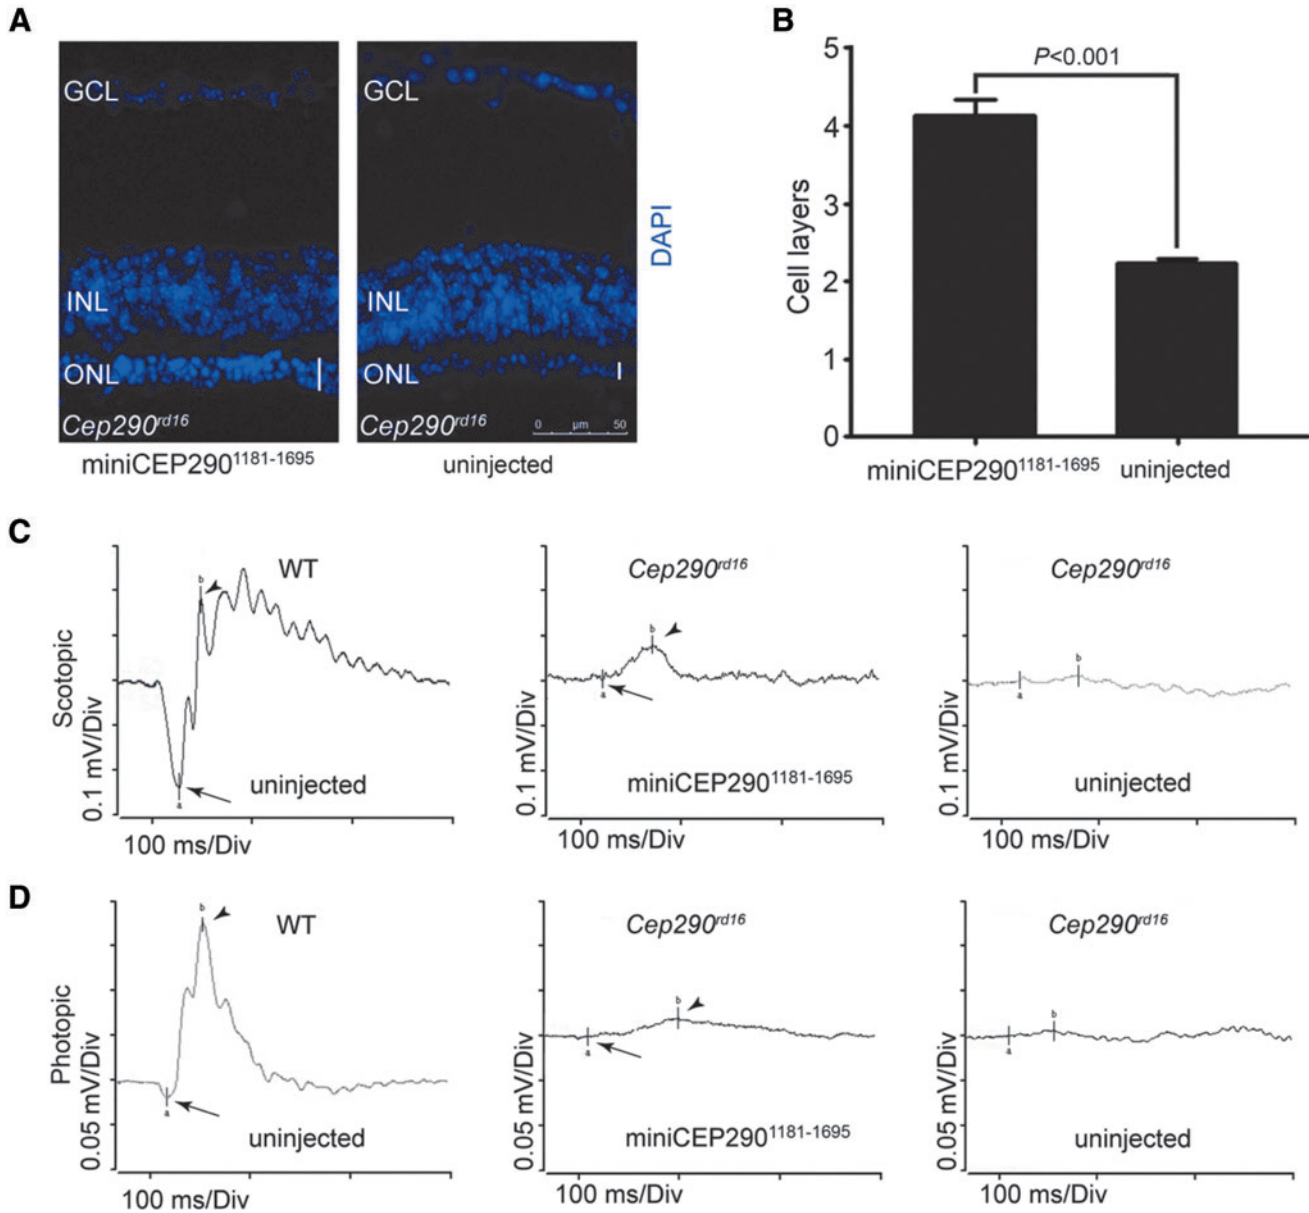

**Supplementary Figure S1.** *In vivo* rescue potential of miniCEP290<sup>1181-1695</sup>. **(A)** *Cep290rd16* retinas injected with indicated miniCEP290 were stained with DAPI (blue). Age-matched uninjected *Cep290rd16* retinas were used as controls. The ONL is marked with vertical lines. **(B)** Quantification of the ONL thickness by counting the number of layers of the virus infected region of the *Cep290rd16* mice at 3 weeks post injection is represented. **(C and D)** Scotopic **(C)** and photopic **(D)** ERG analysis of the miniCEP290<sup>1181-1695</sup> injected retinas showed mild improvement at 3 weeks of age. The ERG a-wave is represented by arrows, while b-wave is depicted using arrowheads.
